# Supplementary material for: Transcriptomic and Metabolomic Analyses Provide Insights into the Formation of the Peach-like Aroma of Fragaria nilgerrensis Schlecht. Fruits
Source: MDPI journal article supplement (doi:10.3390/genes13071285), 2022-07-20
Supplement: s1 [file s1]

**Table S1 Primers used for qRT-PCR analysis.**

| Gene                     | Forward primer (5'→ 3') | Reverse primer (5'→ 3') | Annealing temperature (°C) |
|--------------------------|-------------------------|-------------------------|----------------------------|
| <i>FaActin</i>           | CGAGCTGTTTTCCCTAGCAT    | TCATCTTCTCACGATTAGCCTT  | 55.0                       |
| <i>gene-LOC101312801</i> | ATCCTCTGATTACAGTTTCC    | ACACTCCCAGCCGCTCAGCCT   | 51.6                       |
| <i>gene-LOC101293406</i> | GTGAGCCAGTAGTAATAGCAA   | ATTGATAAGGATTTGCCTGG    | 51.3                       |
| <i>gene-LOC101309231</i> | ACGAGTGTGGCCACCACGCCT   | TCCGATGTTGGAGTGGTGGCG   | 63.1                       |
| <i>gene-LOC101311794</i> | AGATAGAGTTATGGGGCTTGT   | TCTTCCCGGTTCCCTGGAATTG  | 57.3                       |
| <i>gene-LOC101309291</i> | AGCAGTGGAAAACCCGTATAC   | TGCACATCCTAAAATGGCAG    | 54.7                       |
| <i>gene-LOC105349995</i> | ACCATTTTCATATCATTAACAT  | CCATATTGTGCCACCTATCGG   | 55.8                       |
| <i>gene-LOC105352442</i> | CAGTCAGCTGTTGATCATCAC   | TGTGATGTCATTGACATTATT   | 53.5                       |
| <i>gene-LOC101313165</i> | AAGGAAGAGAATGCTGTCTGA   | GTGGTTCTCCTTCCTCAGCTG   | 58.1                       |
